# Supplementary material for: Polyethylenimine/grapefruit peel hybrid biosorbent for the removal of toxic CdTe quantum dots from water
Source: Royal Society of Chemistry journal article supplement (doi:10.1039/c5ra08129g), 2015-01-01
Supplement: c5ra08129g1.pdf [file c5ra08129g1.pdf]

Electronic Supplementary Information

**Polyethylenimine/grapefruit peel hybrid biosorbent for  
removal of toxic CdTe quantum dots from water**

Ying Zhang, Baozhu Hu, Yuming Huang\*

The Key Laboratory of Eco-environments in Three Gorges Reservoir Region,  
Ministry of Education, College of Chemistry and Chemical Engineering, Southwest  
University, Chongqing 400715, China.

## Adsorption kinetics

Two kinetic models, namely pseudo-first-order (eq 1)<sup>1</sup> and pseudo-second-order (eq 2)<sup>2</sup>, were used to describe the adsorption behavior.

$$\ln(q_e - q_t) = \ln q_e - kt \quad (1)$$

$$t/q_t = 1/v_0 + t/q_e \quad (2)$$

where  $q_e$  (mg/g) and  $q_t$  (mg/g) represent the adsorption capacity at equilibrium and at time  $t$ ,  $k$  is the pseudo-first-order adsorption rate constant, and  $v_0$  is the initial adsorption rate (mg g<sup>-1</sup> h<sup>-1</sup>). The regression coefficient values ( $R^2$ ) and related parameters obtained from pseudo-first-order and pseudo-second-order models are shown in Table S2.

## Adsorption isotherms

The isotherm data were fitted by the Langmuir (eq 3)<sup>3</sup> and Freundlich (eq 4)<sup>4</sup> isotherms according equations as follows:

$$1/q_e = 1/q_{\max} + (1/q_{\max}b) (1/C_e) \quad (3)$$

$$\log q_e = \log k + (1/n) \log C_e \quad (4)$$

where  $q_e$  (mg/g) and  $q_{\max}$  (mg/g) are the equilibrium adsorption capacity and the maximum adsorption capacity,  $C_e$  (mg/L) is the concentration of solution at equilibrium,  $b$  is the constant related to energy of adsorption,  $k$  and  $n$  are the constants of Freundlich adsorption. The parameters of the Langmuir and Freundlich models calculated from the adsorption isotherms are listed in Table S3.

## References

1. M. Najafi, Y. Yousefi, A. A. Rafati, *Sep. Purif. Technol.*, 2012, **85**, 193–205.

2. L. Wang,; X. L. Wu, W. H. Xu, X. J. Huang, J. H. Liu, A. W. Xu, *ACS App. Mater. Interfaces*, 2012, **4**, 2686–2692.
3. Z. Yu, X. Zhang, Y. Huang, *Ind. Eng. Chem. Res.*, 2013, **52**, 11956–11966.
4. J. Wang, L. Zhao, W. Duan, L. Han, Y. Chen, *Ind. Eng. Chem. Res.*, 2012, **51**, 13655–13662.

**Table S1.** Nitrogen content of GP and PEI-GP by the XPS analysis

| Biosorbent | Nitrogen content (at. %) |
|------------|--------------------------|
| GP         | 4.29                     |
| PEI-GP-0.8 | 7.13                     |

**Table S2.** The relevant parameters of the pseudo-first-order and the pseudo-second-order kinetics

| Adsorbents | $q_{e,exp}$<br>(mg g <sup>-1</sup> ) | Pseudo-first-order                   |                           |        | Pseudo-second-order                  |                                                |        |
|------------|--------------------------------------|--------------------------------------|---------------------------|--------|--------------------------------------|------------------------------------------------|--------|
|            |                                      | $q_{e,cal}$<br>(mg g <sup>-1</sup> ) | $k$<br>(h <sup>-1</sup> ) | $R^2$  | $q_{e,cal}$<br>(mg g <sup>-1</sup> ) | $v_0$<br>(mg g <sup>-1</sup> h <sup>-1</sup> ) | $R^2$  |
| PEI-GP-0.2 | 173.24                               | 85.51                                | 0.2234                    | 0.8714 | 177.31                               | 234.19                                         | 0.9991 |
| PEI-GP-0.4 | 280.83                               | 121.58                               | 0.1634                    | 0.8973 | 288.18                               | 336.70                                         | 0.9996 |
| PEI-GP-0.6 | 377.07                               | 271.66                               | 0.2632                    | 0.8578 | 400.00                               | 275.48                                         | 0.9971 |
| PEI-GP-0.8 | 431.84                               | 392.06                               | 0.2338                    | 0.9844 | 478.47                               | 195.70                                         | 0.9961 |
| PEI-GP-1.0 | 356.03                               | 251.72                               | 0.2448                    | 0.9766 | 383.14                               | 243.31                                         | 0.9970 |

**Table S3.** Freundlich isotherm and langmuir isotherm parameters for adsorption of CdTe DQs onto PEI-GP

| Adsorbents | Langmuir      |                   |        | Freundlich |       |        |
|------------|---------------|-------------------|--------|------------|-------|--------|
|            | $b$<br>(L/mg) | $q_{\max}$ (mg/g) | $R^2$  | $n$        | $k$   | $R^2$  |
| PEI-GP-0.2 | -0.0023       | -62.933           | 0.3998 | 0.552      | 0.006 | 0.9542 |
| PEI-GP-0.4 | -0.0004       | -342.466          | 0.3409 | 0.707      | 0.104 | 0.9555 |
| PEI-GP-0.6 | -0.0001       | -1080.66          | 0.1722 | 0.806      | 0.374 | 0.9396 |
| PEI-GP-0.8 | -0.0001       | -1078.76          | 0.2388 | 0.790      | 0.403 | 0.9434 |
| PEI-GP-1.0 | -0.00009      | -1546.42          | 0.2138 | 0.835      | 0.600 | 0.9713 |

**Table S4.** Concentrations of K<sup>+</sup>, Na<sup>+</sup>, Ca<sup>2+</sup> and Mg<sup>2+</sup> in the tested water samples

| Water sample     | K <sup>+</sup><br>(mg/L) | Na <sup>+</sup><br>(mg/L) | Ca <sup>2+</sup><br>(mg/L) | Mg <sup>2+</sup><br>(mg/L) |
|------------------|--------------------------|---------------------------|----------------------------|----------------------------|
| ultra pure water | not detected             | not detected              | not detected               | not detected               |
| tap water        | 2.30                     | 11.9                      | 56.0                       | 12.2                       |
| wastewater       | 12.2                     | 59.0                      | 74.7                       | 13.1                       |

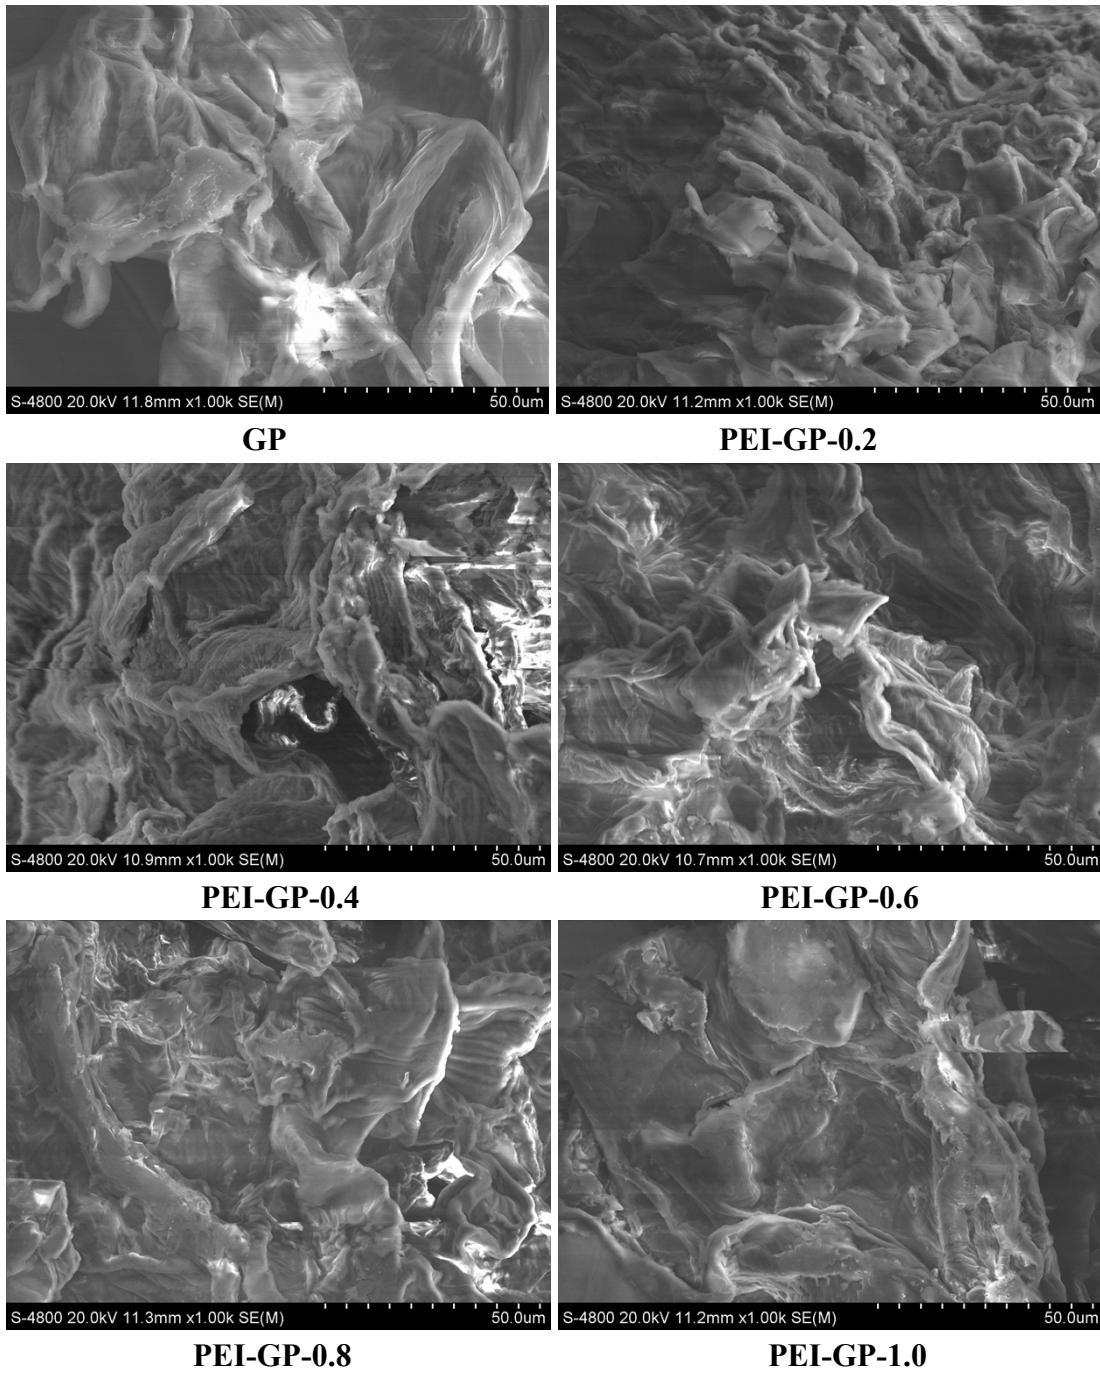

**Figure S1.** SEM images of GP and PEI-GP with different PEI content

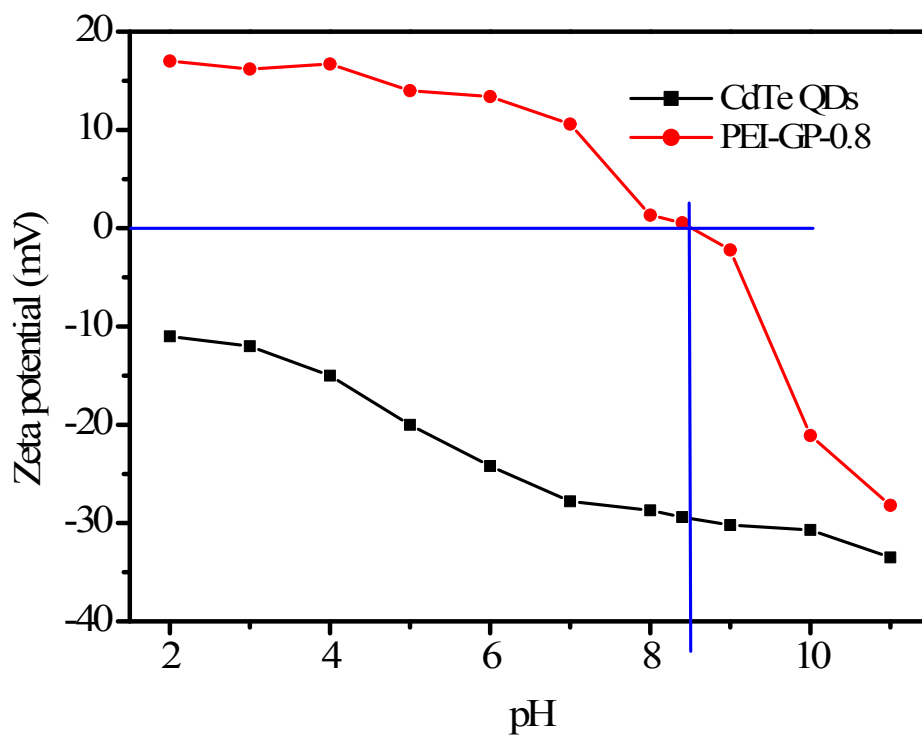

**Figure S2.** The effect of solution pH on the zeta potential of CdTe QDs and PEI-GP-0.8 adsorbent

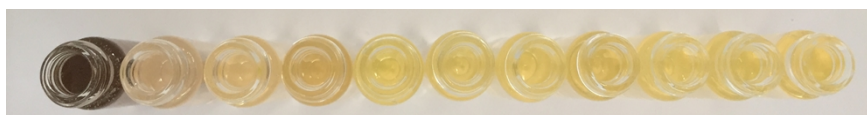

**Figure S3.** Images of CdTe QDs under different solution pH ranging from 2 to 11 (from *left to right*: 2, 3, 4, 5, 6, 7, 8, 8.4, 9, 10, and 11)

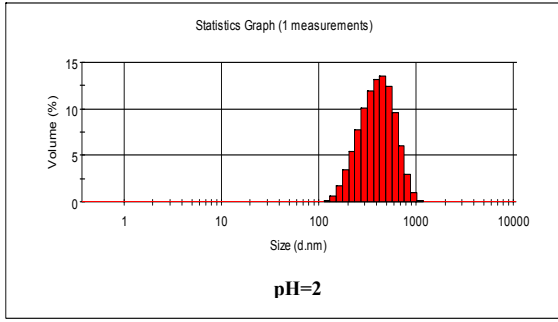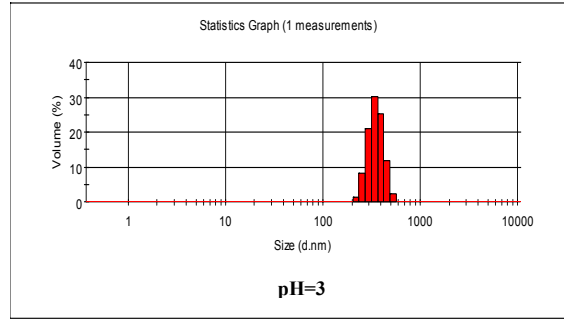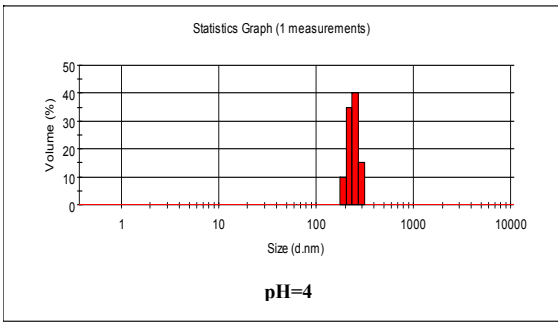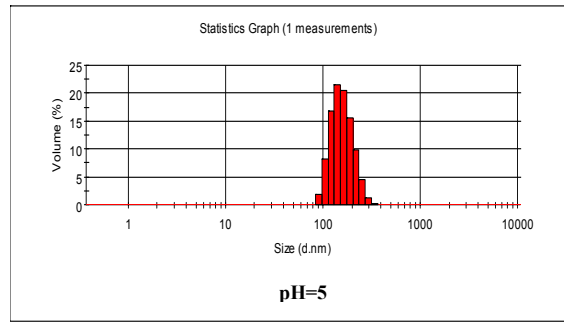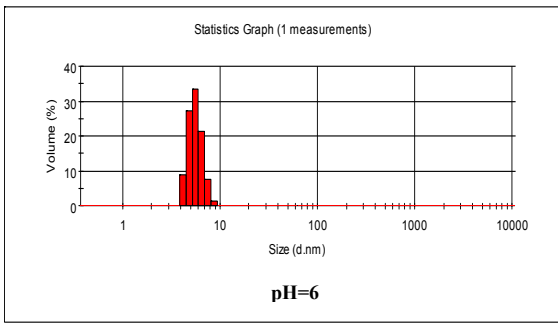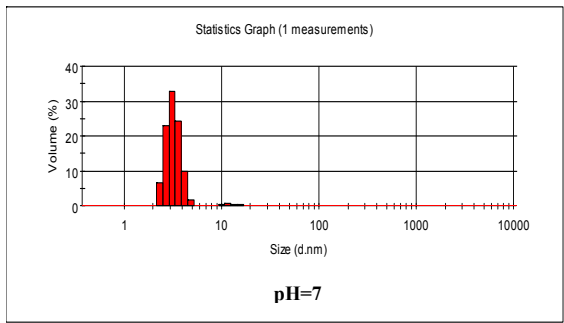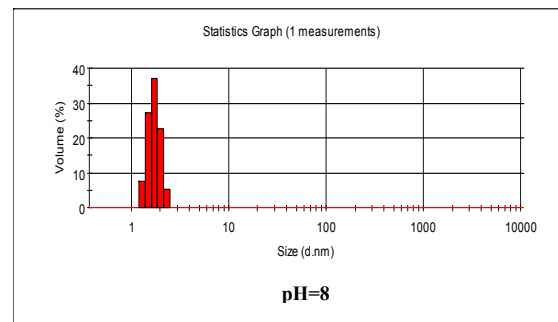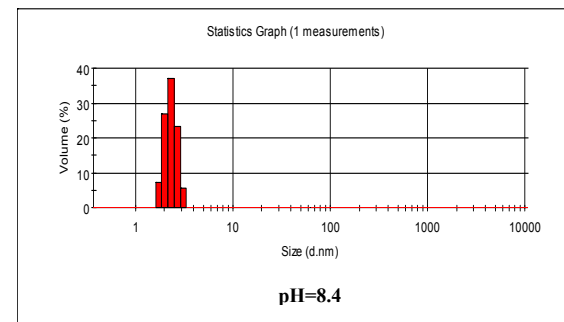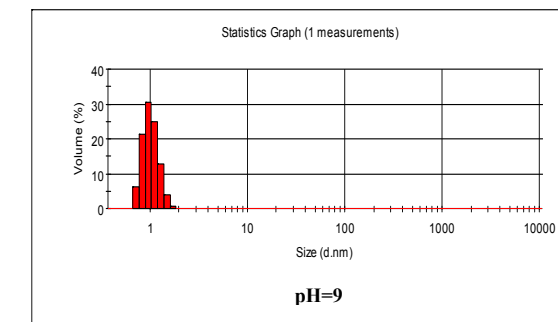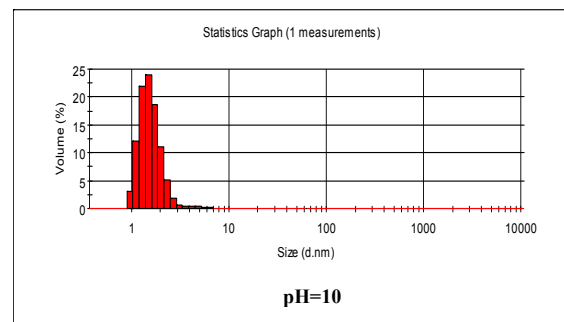

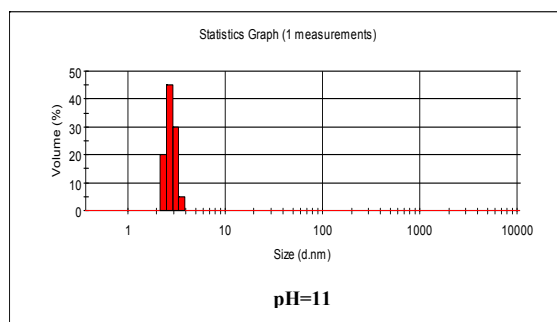

**Figure S4.** Hydrodynamic diameter distributions of CdTe QDs under different solution pH ranging from 2 to 11.



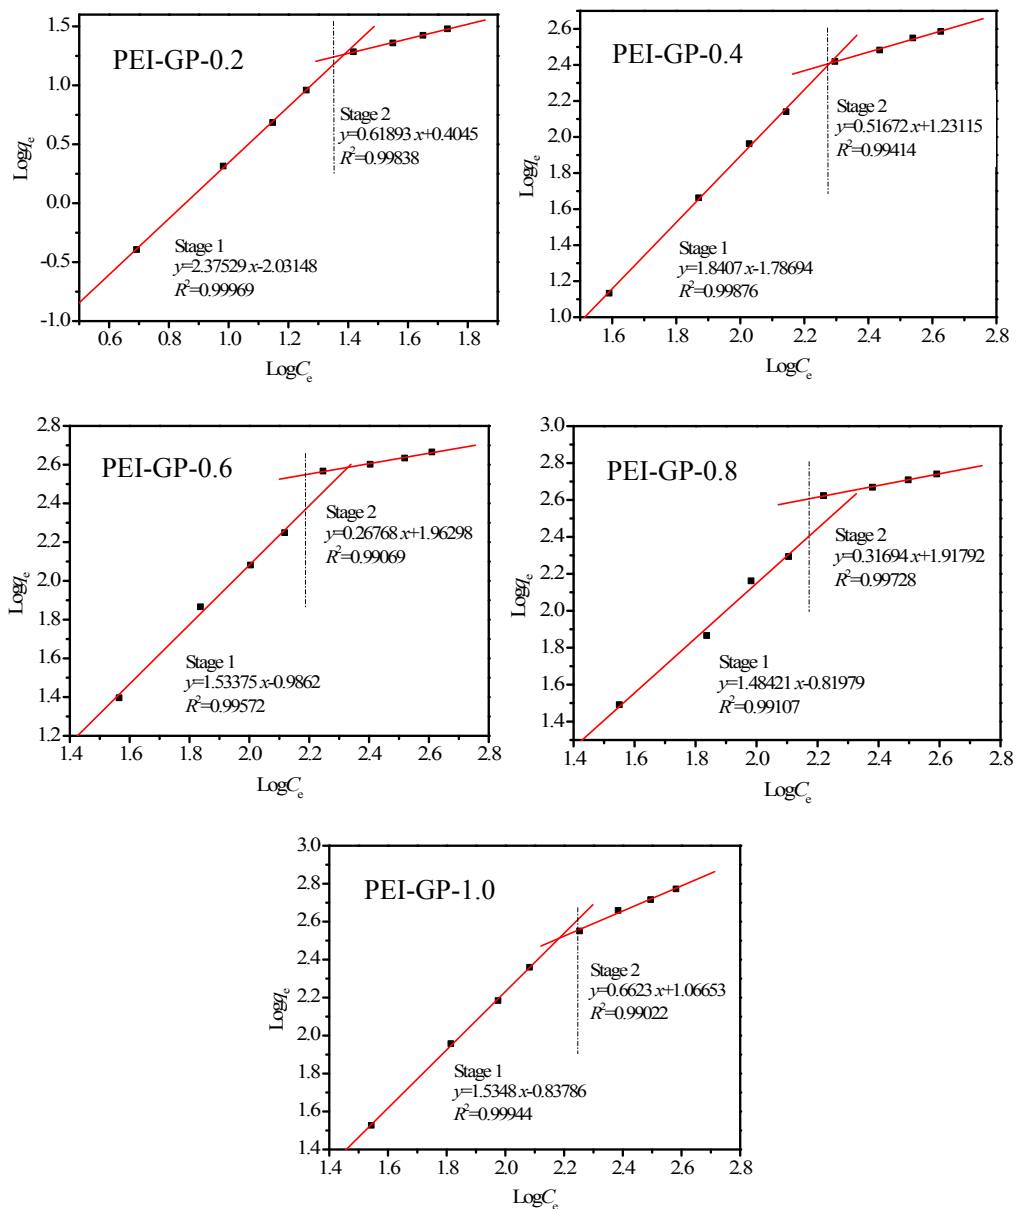

**Figure S5.** The absorption isotherm model of CdTe QDs onto PEI-GP adsorbents by Freundlich model fitting

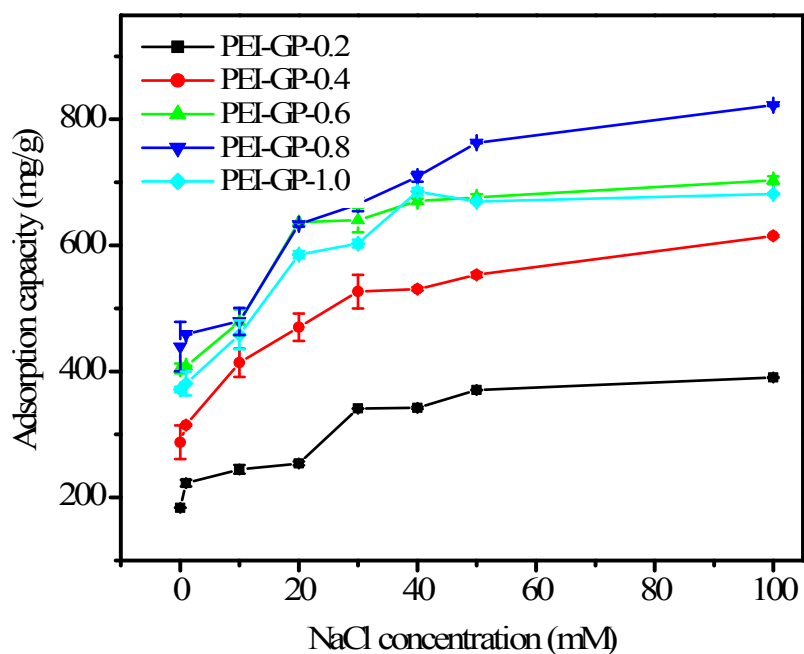

**Figure S6.** Effect of NaCl concentration on the adsorption of CdTe QDs onto PEI-GP

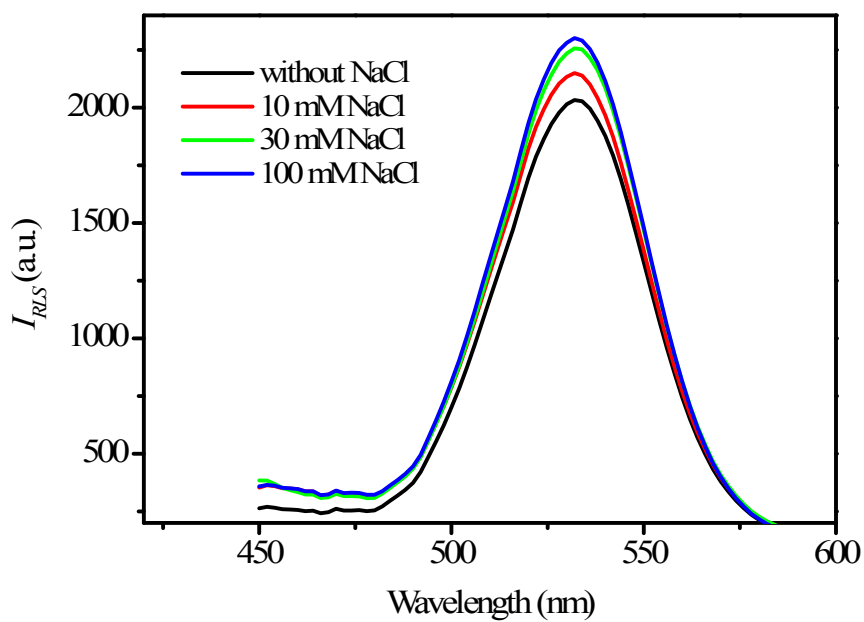

**Figure S7.** RLS spectra of CdTe QDs in the presence of various concentrations of NaCl.

QDs (A)

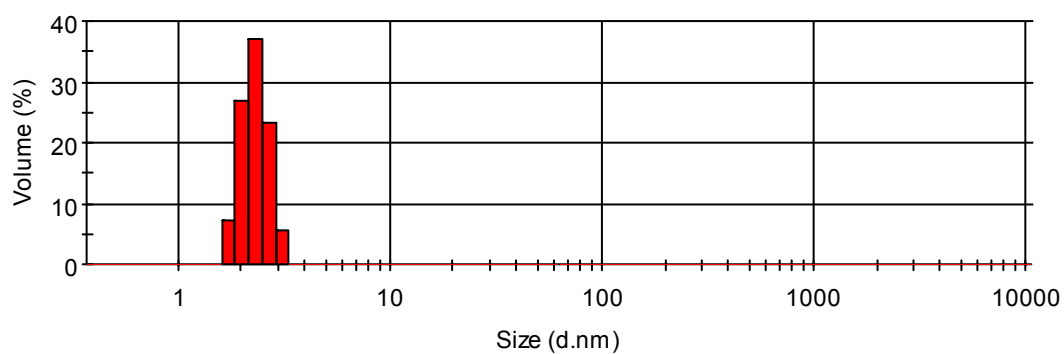

100 mM NaCl (B)

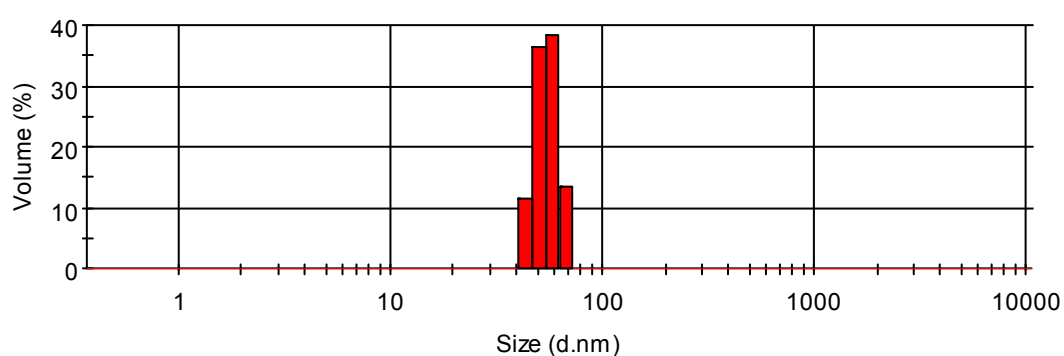

1 mM CaCl<sub>2</sub> (C)

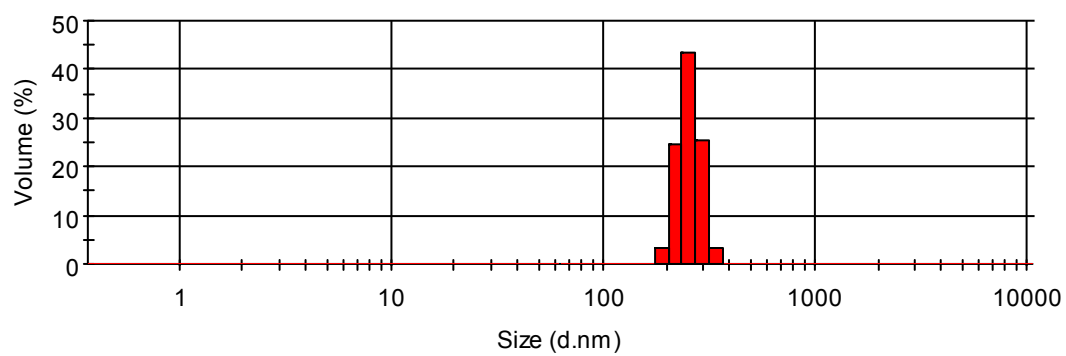

**Figure S8.** Hydrodynamic diameter distribution of CdTe QDs (A) in the presence of 100 mM NaCl (B) and 1 mM CaCl<sub>2</sub> (C).

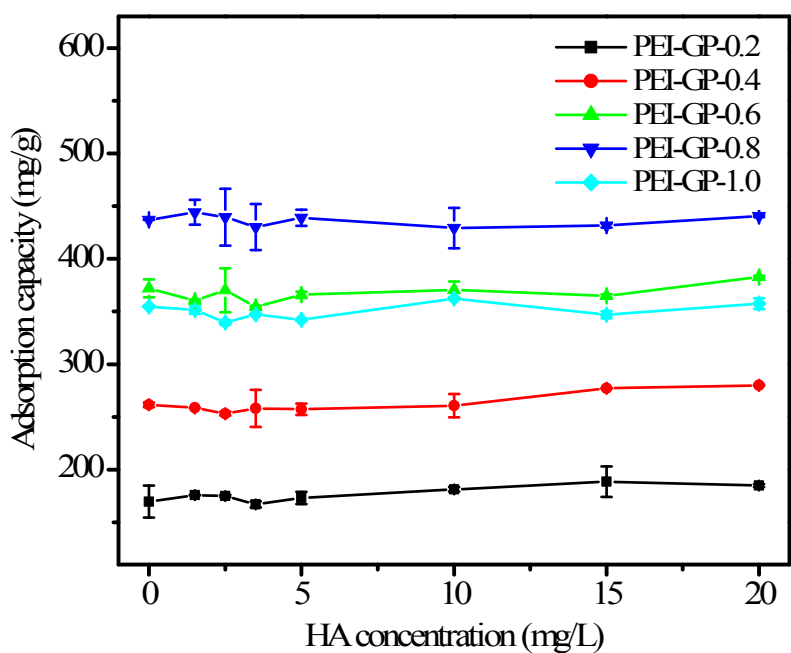

**Figure S9.** Effect of HA concentration on the adsorption of CdTe QDs onto PEI-GP.

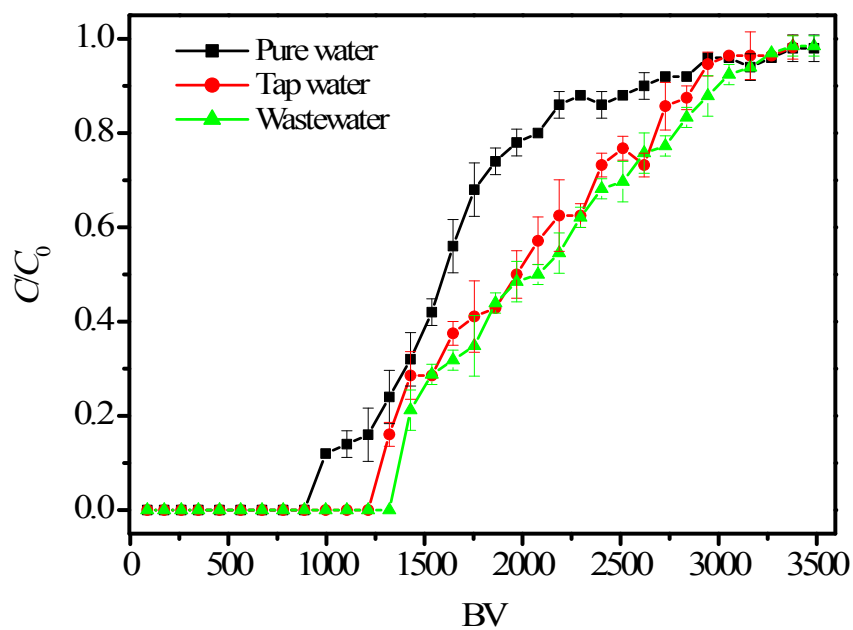

**Figure S10.** Breakthrough curves for PEI-GP mini-column for biosorption of CdTe QDs in pure water, tap water and wastewater.
